# Supplementary material for: Direct prediction of the desalination performance of porous carbon electrodes for capacitive deionization
Source: Royal Society of Chemistry journal article supplement (doi:10.1039/c3ee42209g), 2013-01-01
Supplement: c3ee42209g.zip [file c3ee42209g.zip]

## Sheet: calculator
	Measured pore volume up to 30 nm:								0.918508	cc/g
	Predicted NaCl adsorption @ 5 mM & 1.2 V:								10.6208	mg/g
	Measured data					Calculated data
	Pore size (nm)	Cumulative pore volume (cm³/g)				Cutoff size (nm)	Cumulative pore volume (cm³/g)	Capacity (mg/g)	ζ (M)
	0.614	0.07528				0.5	0.00895701	3.74131	0.515
	0.666	0.10439				0.6	0.0644299
	0.723	0.13834				0.7	0.12431						Instructions
	0.785	0.17616				0.8	0.185093	7.00124	0.279
	0.852	0.21606				0.9	0.241714						Paste data with "insert data" into the "measured data" section, without any formatting
	0.926	0.25561				1	0.288901
	1.007	0.29205				1.1	0.324248
	1.096	0.32318				1.2	0.350749	10.4762	0.107				Carefully inspect if the interpolated / extrapolated values are reasonable when comparing with the measured data
	1.193	0.34907				1.3	0.374753
	1.299	0.37449				1.4	0.401087
	1.416	0.4053				1.5	0.428992						(*) per gram of all porous carbon in both electrodes combines
	1.543	0.44112				1.6	0.455833
	1.682	0.477				1.7	0.481389						Literature
	1.834	0.51406				1.8	0.50577						Porada et al. EES, 2013
	2	0.5497				1.9	0.52823
	2.183	0.58464				2	0.5497
	2.382	0.61933				3	0.715846
	2.6	0.65811				4	0.8092
	2.838	0.69491				5	0.856824
	3.099	0.72864				6	0.879963
	3.385	0.75938				7	0.890124	10.5306	0.0917143
	3.698	0.78736				8	0.896696	10.5615	0.08025
	4.039	0.81202				9	0.900373	10.5768	0.0713333
	4.413	0.83393				10	0.902779	10.5858	0.0642
	4.823	0.85153				11	0.904482	10.5916	0.0583636
	5.27	0.8649				12	0.905931	10.5962	0.0535
	5.76	0.8763				13	0.906987	10.5992	0.0493846
	6.296	0.88448				14	0.907825	10.6014	0.0458571
	6.883	0.88923				15	0.908915	10.6042	0.0428
	7.524	0.89413				16	0.909678	10.606	0.040125
	8.227	0.89792				17	0.910239	10.6072	0.0377647
	8.995	0.90036				18	0.91086	10.6085	0.0356667
	9.835	0.90249				19	0.911737	10.6102	0.0337895
	10.755	0.9041				20	0.912786	10.6122	0.0321
	11.761	0.90567				21	0.9134	10.6133	0.0305714
	12.861	0.90687				22	0.913951	10.6142	0.0291818
	14.066	0.90788				23	0.91456	10.6152	0.027913
	15.383	0.90934				24	0.91517	10.6162	0.02675
	16.825	0.91013				25	0.915922	10.6173	0.02568
	18.402	0.91111				26	0.916688	10.6184	0.0246923
	20.128	0.91292				27	0.91724	10.6192	0.0237778
	22.016	0.91396				28	0.91768	10.6198	0.0229286
	24.082	0.91522				29	0.918113	10.6203	0.0221379
	26.343	0.91695				30	0.918508	10.6208	0.0214
	28.816	0.91804
	31.522	0.91911
	34.482	0.92067
